# Supplementary material for: Fallout of Lead Over Paris From the 2019 Notre‐Dame Cathedral Fire
Source: PubMed Central journal article supplement (PMC8027784; doi:10.1029/2020gh000279), 2020-08-21
Supplement: GH2-4-e2020GH000279-s001.pdf [file GH2-4-e2020GH000279-s001.pdf]

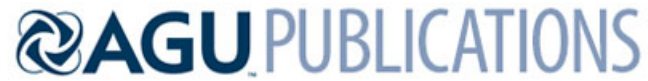

*GeoHealth*

Supporting Information for

**Fallout of Lead over Paris from the 2019 Notre-Dame Cathedral Fire**

Alexander van Geen<sup>1</sup>, Yuling Yao<sup>2</sup>, Tyler Ellis<sup>1</sup>, and Andrew Gelman<sup>2</sup>

<sup>1</sup>Lamont-Doherty Earth Observatory of Columbia University. Palisades, NY 10964, USA

<sup>2</sup>Department of Statistics, Columbia University. New York, NY 10027, USA

**Contents of this file**

Derivations for calculating excess Pb concentrations and inventories.

**Excess Pb along a ring.** The plume is a sector defined by  $\mathcal{C} = \{\theta : 260^\circ < \theta < 310^\circ\}$ . At each distance  $\tilde{r}$ , we compute the plume excess, the difference of soil Pb (ppm) between the plumes on the outside along the radius  $r$  ring, by

$$\text{Excess}^f(\tilde{r}) = \frac{\sum_{j:\tilde{\theta}_j \in \mathcal{C}} f(\tilde{\theta}_j, \tilde{r})}{\sum_{j:\theta_j \in \mathcal{C}} 1} - \frac{\sum_{j:\tilde{\theta}_j \notin \mathcal{C}} f(\tilde{\theta}_j, \tilde{r})}{\sum_{j:\theta_j \notin \mathcal{C}} 1}, \quad (3)$$

where  $f(\tilde{\theta}_j, \tilde{r})$  is a posterior predictive draw of  $\tilde{f}$  at location  $\tilde{\theta}_j, \tilde{r}$  using (1). Because it is calculated using posterior draws, expression (3) is a random variable whose posterior distribution we can summarize using the mean or quantile of its simulation draws.

Likewise we compute the excess Pb at the observational level,

$$\text{Excess}^y(\tilde{r}) = \frac{\sum_{j:\tilde{\theta}_j \in \mathcal{C}} y(\tilde{\theta}_j, \tilde{r})}{\sum_{j:\theta_j \in \mathcal{C}} 1} - \frac{\sum_{j:\tilde{\theta}_j \notin \mathcal{C}} y(\tilde{\theta}_j, \tilde{r})}{\sum_{j:\theta_j \notin \mathcal{C}} 1}. \quad (4)$$

where  $y(\tilde{\theta}_j, \tilde{r})$  denotes a posterior predictive draw of  $\tilde{y}|\tilde{f}(\tilde{\theta}_j, \tilde{r})$  using (2). In general,  $\text{Excess}^y(\tilde{r})$  has a larger posterior variance. It is because of the noise  $\epsilon$ : such that there are more uncertainty even if we repeat sampling in the same location. It also has larger posterior mean than  $\text{Excess}^f(\tilde{r})$ . This is due to the multiplicative measurement error in  $\epsilon$ . For example, if there is a multiplicative noise source that will halve or double the true value  $f$  with equal probability, the posterior mean of  $y$  becomes  $\frac{2+0.5}{2}f = 1.25f$ .

**Excess Pb inside a circle.** We further aggregate the the excess amount of Pb in the plume within the circle of radius  $r$ . To this end, we reweigh the excess density of the ring by its radius,

$$\text{Excess}_{\text{circle}}^f(\tilde{r}) = \int_0^{\tilde{r}} r' \text{Excess}^f(r') dr', \quad (5)$$

and

$$\text{Excess}_{\text{circle}}^y(\tilde{r}) = \int_0^{\tilde{r}} r' \text{Excess}^y(r') dr'. \quad (6)$$

Finally we estimate the excess amount of Pb of the plume inside a circle with any given any radius  $\tilde{r}$  by

$$\frac{|\mathcal{C}|}{360} \times \pi \tilde{r}^2 \times \text{thickness} \times \text{soil density} \times \text{Excess}_{\text{circle}}^y(\tilde{r}). \quad (7)$$

For all the above quantities we compute the posterior mean, 50%, and 95% intervals using the simulation draws, a soil thickness of 1 cm, and a dry bulk soil density of 1.3 g/cm<sup>3</sup>. Differences in soil density between sampling sites are not considered.
